# Supplementary material
Source: HighWire-hosted journal article supplement (doi:10.1101/rna.079797.123)

“Post-transcriptional modification to the core of tRNAs modulates translational misreading errors”

Sima Saleh and Philip J. Farabaugh

### **Supplementary material.**

In this study we tested the effect of lack of each modification affecting any of the error-prone near-cognate tRNAs (blue columns in **Table S1**) or competing cognate tRNAs (green columns in **Table S1**) specific for each codon tested for misreading frequency. Each tRNA has a specific subset of possible modifications targeting the five structural regions of the tRNA: Acceptor Arm (A Arm), Dihydrouridine Arm (D Arm), Anticodon Arm (AC Arm), Extra Loop, or TΨC Arm (T Arm) shown labeled in the first column. **Table S1** presents the modification status (+ = modified) for each modification gene, modification and tRNA isoacceptor. Note that because deletion of the *TRM61* gene responsible for m<sup>1</sup>A<sub>58</sub> modification in the T loop is lethal we were unable to measure misreading error frequencies in the absence of this modification. The tRNAs are labeled by anticodon shown in 5'-3' order; e.g., tRNA<sub>UUC</sub><sup>Glu</sup> is the glutamate inserting isoacceptor with the anticodon 5'-UUC-3'. The predicted cognate codons for these tRNAs are also listed (e.g., 5'-GAA-3'/5'-GAG-3').

**Tables S2 and S3** present the data used to create **Figures 3 and 4**. The values plus or minus SEM for enzyme assays are shown as the calculated value x 10<sup>-4</sup> (e.g. for WT errors at UAG: 21 ± 3.5. The statistical significance of the values for the various mutants were calculated using the Student's T-test (two-tailed, homoscedastic) comparing all values for activity of each mutant strain to all values for the wild type.

The data from the quantification of results of tRNA Northern blots is shown in **Table S4** for the indicated tRNAs purified from the wild type and all the relevant tRNA modification mutant strains and separated by denaturing polyacrylamide gel electrophoresis. The

volume of each band is indicated in units relative to the volume of the control 5S rRNA band visualized from the same RNA preparation. The bands were visualized using a C-DiGit® Blot Scanner (LI-COR, Lincoln, NE) and the signal intensities of various tRNA species were quantified using ImageJ software or by Image Studio (LI-COR) and normalized to the 5S RNA controls.

An *mnt1*Δ mutation, which blocks retrograde tRNA transport to the nucleus, was used to determine whether retrograde transport of any of the tRNAs could explain differences in misreading error frequencies. This data appears in **Figure 7** and **Table S5**. The tabular data are presented as in **Table S2**. The value of the wild type and each modification mutant strain are compared with the congenic *met10*Δ strain and in no case is the difference significant. This argues against a role for retrograde transport in the effects of the modification mutations.

Dot blot RNA blotting analysis of total RNA from each of the modification mutant strains used in the misreading studies is shown in **Figure S1**. Total RNA (20 μg) purified from cells grown in YPD medium to mid-exponential phase as described (Chatterjee et al. 2017) was spotted onto Hybond Np membrane (Amersham Biosciences) and crosslinked by using a Stratagene UV cross-linker (Model #2400). Probes designed to hybridize with each of the tRNAs relevant to this study and 5S rRNA were each successively hybridized to the membrane bound RNA and visualized as described (Wu, Huang and Hopper 2013). After each hybridization, the membrane was stripped of probe and rehybridized, with hybridization to the 5S rRNA probe. This experiment was qualitative, showing that the amount of each tRNA present appeared to be approximately equal for all the RNA samples. This analysis was supplemented by Northern blotting with a subset of the modification mutant strains, shown in **Figure 5** and **Table S4**.

To determine the level of specificity of the designed tRNA probes, we performed a dot blot analysis using DNA molecules corresponding to each full length tRNA molecule. **Figure S2** shows the result of that analysis. The image produced by visualizing the biotin-

labeled probes for each tRNA is shown on the right. Note that for each probe, labeling was predominant for a single spotted target DNA corresponding to the tRNA for which it was designed.

**Table S1:** Core modifications of tRNA in this study

| Structural Region | Gene         | Modification*                                                   | Error-prone near-cognate tRNAs     |                                    |                                    | Competing cognate tRNAs            |                                    |                                    |                                    |                                    |                                    |
|-------------------|--------------|-----------------------------------------------------------------|------------------------------------|------------------------------------|------------------------------------|------------------------------------|------------------------------------|------------------------------------|------------------------------------|------------------------------------|------------------------------------|
|                   |              |                                                                 | tRNA <sup>Glu</sup> <sub>UUC</sub> | tRNA <sup>Lys</sup> <sub>UUU</sub> | tRNA <sup>Lys</sup> <sub>CUU</sub> | tRNA <sup>Arg</sup> <sub>CCU</sub> | tRNA <sup>Arg</sup> <sub>UCU</sub> | tRNA <sup>Asn</sup> <sub>GUU</sub> | tRNA <sup>Asp</sup> <sub>GUC</sub> | tRNA <sup>Gly</sup> <sub>UCC</sub> | tRNA <sup>Gly</sup> <sub>CCC</sub> |
|                   |              |                                                                 | GAA/<br>GAG                        | AAA/<br>AAG                        | AAG                                | AGG                                | AGA                                | GAU/<br>GAC                        | GAU/<br>GAC                        | GGA/<br>GGG                        | GGG                                |
| A Arm             | <i>TRM10</i> | m <sup>1</sup> G <sub>9</sub>                                   |                                    |                                    | +                                  | +                                  | +                                  |                                    |                                    |                                    | +                                  |
|                   | <i>TRM13</i> | Cm <sub>4</sub>                                                 |                                    |                                    |                                    |                                    |                                    |                                    |                                    |                                    | +                                  |
|                   | <i>TRM11</i> | m <sup>2</sup> G <sub>10</sub>                                  |                                    | +                                  | +                                  | +                                  | +                                  | +                                  |                                    |                                    | +                                  |
| D Arm             | <i>PUS7</i>  | Ψ <sub>13</sub>                                                 | +                                  |                                    |                                    |                                    |                                    |                                    |                                    | +                                  | +                                  |
|                   | <i>DUS1</i>  | D <sub>16</sub> /D <sub>17</sub>                                |                                    | +                                  | +                                  | +                                  | +                                  | +                                  | +                                  | +                                  | +                                  |
|                   | <i>DUS2</i>  | D <sub>20</sub>                                                 |                                    | +                                  | +                                  |                                    |                                    | +                                  | +                                  | +                                  | +                                  |
|                   | <i>DUS4</i>  | D <sub>20a</sub>                                                | +                                  |                                    |                                    |                                    |                                    | +                                  |                                    |                                    |                                    |
|                   | <i>TRM1</i>  | m <sup>2</sup> G <sub>26</sub>                                  |                                    | +                                  | +                                  | +                                  | +                                  | +                                  | +                                  |                                    |                                    |
| AC Arm            | <i>PUS1</i>  | Ψ <sub>1</sub> /Ψ <sub>27</sub>                                 | +                                  | +                                  | +                                  | +                                  | +                                  |                                    |                                    |                                    |                                    |
|                   | <i>PUS3</i>  | Ψ <sub>39</sub>                                                 |                                    | +                                  | +                                  |                                    |                                    |                                    | +                                  |                                    |                                    |
| Extra Loop        | <i>TRM8</i>  | m <sup>7</sup> G <sub>46</sub>                                  |                                    | +                                  |                                    |                                    |                                    |                                    |                                    |                                    |                                    |
|                   | <i>DUS3</i>  | D <sub>47</sub>                                                 |                                    | +                                  |                                    |                                    |                                    | +                                  |                                    |                                    |                                    |
|                   | <i>TRM4</i>  | m <sup>5</sup> C <sub>48</sub> / m <sup>5</sup> C <sub>49</sub> | +                                  | +                                  |                                    |                                    |                                    | +                                  | +                                  |                                    | +                                  |
| T Arm             | <i>PUS4</i>  | Ψ <sub>55</sub>                                                 | +                                  | +                                  | +                                  | +                                  | +                                  | +                                  | +                                  | +                                  | +                                  |
|                   | <i>TRM2</i>  | m <sup>5</sup> U <sub>54</sub>                                  | +                                  | +                                  | +                                  | +                                  | +                                  | +                                  | +                                  | +                                  | +                                  |
|                   | <i>TRM61</i> | m <sup>1</sup> A <sub>58</sub>                                  |                                    |                                    | +                                  |                                    | +                                  | +                                  |                                    |                                    |                                    |

\* D, dihydrouridine; Y, pseudouridine; m<sup>2</sup>G, N<sup>2</sup>,N<sup>2</sup>-dimethylguanosine; m<sup>5</sup>U, 5-methyluridine; m<sup>5</sup>C, 5-methylcytidine; m<sup>7</sup>G, 7-methylguanosine; m<sup>1</sup>G, 1-methylguanosine; m<sup>2</sup>G, 2-methylguanosine; Cm, 2-O-methylcytidine; m<sup>1</sup>A, 1-methyladenosine

**Table S2:** Effect of lack of modification enzymes of misreading frequencies by tRNA<sup>Lys</sup>

| Mutation                                                                                    | Lys | Ter            | Arg             | Asn             |               |
|---------------------------------------------------------------------------------------------|-----|----------------|-----------------|-----------------|---------------|
|                                                                                             |     | UAG            | AGG             | AAU             | AAC           |
| Activity of <i>P. pyralis</i> luciferase relative to wild type enzyme (x 10 <sup>-4</sup> ) |     |                |                 |                 |               |
| WT                                                                                          |     | 21 ± 3.5       | 8.4 ± 0.86      | 1.6 ± 0.27      | 1.8 ± 0.29    |
| <i>dus1</i> Δ                                                                               | +   | 11 ± 1.0 *     | + 14 ± 1.2 **   | + 3.3 ± 0.85*   | 3.1 ± 0.16*   |
| <i>dus2</i> Δ                                                                               | +   | 4.7 ± 1.5***   | + 11 ± 0.31 *   | + 1.5 ± 0.32    | 2.0 ± 0.44    |
| <i>dus3</i> Δ                                                                               | +   | 7.6 ± 1.2**    | - 9.6 ± 1.4     | + 2.5 ± 0.55    | 2.4 ± 0.48    |
| <i>dus4</i> Δ                                                                               | -   | 22 ± 2.3       | - 8.9 ± 0.95    | + 3.0 ± 0.55*   | 3.2 ± 0.13*** |
| <i>pus1</i> Δ                                                                               | +   | 6.6 ± 1.0***   | + 10 ± 1.5      | - 3.1 ± 0.61*   | 3.8 ± 0.47*** |
| <i>pus3</i> Δ                                                                               | +   | 16 ± 0.57      | - 15 ± 1.0 ***  | + 4.9 ± 1.3 **  | 3.7 ± 0.80*   |
| <i>pus4</i> Δ                                                                               | +   | 12 ± 0.96      | + 17 ± 0.99 *** | + 3.4 ± 0.49**  | 2.7 ± 0.48    |
| <i>trm1</i> Δ                                                                               | +   | 15 ± 1.9       | + 13 ± 2.4 *    | + 2.5 ± 0.76    | 2.7 ± 0.77    |
| <i>trm2</i> Δ                                                                               | +   | 15 ± 4.2       | + 11 ± 2.1      | + 3.8 ± 0.47*** | 4.1 ± 0.45*** |
| <i>trm4</i> Δ                                                                               | +   | 7.6 ± 1.2**    | - 12 ± 0.79 **  | + 2.1 ± 0.22    | 2.7 ± 0.35    |
| <i>trm8</i> Δ                                                                               | +   | 6.3 ± 0.98 *** | - 9.4 ± 1.0     | - 2.6 ± 0.43    | 2.4 ± 0.41    |
| <i>trm8</i> Δ <i>trm4</i> Δ                                                                 | +/+ | 21 ± 3.1       | -/- 6.5 ± 0.86  | -/- 1.3 ± 0.19  | 1.3 ± 0.11    |
| <i>trm 10</i> Δ                                                                             | +   | 9.2 ± 0.93 **  | + 10 ± 0.54     | - 1.5 ± 0.12    | 1.5 ± 0.15    |
| <i>trm11</i> Δ                                                                              | +   | 9.2 ± 0.65 **  | + 12 ± 0.42 **  | + 1.9 ± 0.19    | 1.7 ± 0.16    |

P values: (\*, P < 0.05; \*\*, P < 0.01; \*\*\*, P < 0.001)

**Table S3:** Effect of lack of modification enzymes of misreading frequencies by tRNA<sup>Glu</sup>

| Mutation                                                                                            | Glu | Asp                  |                    | Gly                   |                       |
|-----------------------------------------------------------------------------------------------------|-----|----------------------|--------------------|-----------------------|-----------------------|
|                                                                                                     |     | GAU                  | GAC                | GGA                   | GGG                   |
| Activity of <i>E. coli</i> $\beta$ -galactosidase relative to wild type enzyme ( $\times 10^{-4}$ ) |     |                      |                    |                       |                       |
| WT                                                                                                  |     | 1.4 $\pm$ 0.17       | 1.1 $\pm$ 0.07     | 1.8 $\pm$ 0.29        | 0.27 $\pm$ 0.03       |
| <i>dus1</i> $\Delta$                                                                                | -   | + 1.7 $\pm$ 0.15     | 1.9 $\pm$ 0.02 **  | + 2.1 $\pm$ 0.78      | + 0.59 $\pm$ 0.07 *** |
| <i>dus2</i> $\Delta$                                                                                | -   | - 1.1 $\pm$ 0.22     | 0.85 $\pm$ 0.34    | + 1.2 $\pm$ 0.20      | + 0.14 $\pm$ 0.03 **  |
| <i>dus4</i> $\Delta$                                                                                | +   | - 2.1 $\pm$ 0.12 **  | 1.9 $\pm$ 0.07 *** | + 1.6 $\pm$ 0.18      | - 0.39 $\pm$ 0.02 **  |
| <i>pus1</i> $\Delta$                                                                                | +   | - 2.2 $\pm$ 0.15 **  | 1.5 $\pm$ 0.09 **  | - 3.5 $\pm$ 0.31 **   | - 0.56 $\pm$ 0.07 **  |
| <i>pus4</i> $\Delta$                                                                                | +   | + 0.55 $\pm$ 0.10 ** | 0.66 $\pm$ 0.10 ** | + 0.47 $\pm$ 0.07 *** | + 0.14 $\pm$ 0.02 **  |
| <i>pus7</i> $\Delta$                                                                                | +   | + 0.71 $\pm$ 0.11 ** | 0.80 $\pm$ 0.07 ** | + 1.1 $\pm$ 0.11 *    | - 0.12 $\pm$ 0.01 *** |
| <i>trm2</i> $\Delta$                                                                                | +   | + 3.7 $\pm$ 0.40 **  | 3.6 $\pm$ 0.49 *** | + 1.8 $\pm$ 0.31      | + 1.2 $\pm$ 0.10 ***  |
| <i>trm4</i> $\Delta$                                                                                | +   | + 1.2 $\pm$ 0.22     | 1.5 $\pm$ 0.19     | + 2.1 $\pm$ 0.66      | + 0.38 $\pm$ 0.07     |
| <i>trm10</i>                                                                                        | -   | - 1.3 $\pm$ 0.16     | 1.1 $\pm$ 0.20     | - 2.5 $\pm$ 0.07      | + 0.23 $\pm$ 0.03     |
| <i>trm11</i> $\Delta$                                                                               | -   | - 1.8 $\pm$ 0.15     | 1.3 $\pm$ 0.19     | - 2.4 $\pm$ 0.08      | + 0.41 $\pm$ 0.11     |
| <i>trm13</i> $\Delta$                                                                               | -   | - 1.6 $\pm$ 0.14     | 1.1 $\pm$ 0.16     | - 2.2 $\pm$ 0.10      | + 0.26 $\pm$ 0.05     |

P values: (\*, P < 0.05; \*\*, P < 0.01; \*\*\*, P < 0.001)

**Table S4:** Steady state levels of tRNAs in modification backgrounds

| tRNA      | Scanned Northern value $\pm$ SEM (corrected for 5S rRNA standard) |                      |                      |                      |                      |                                              |
|-----------|-------------------------------------------------------------------|----------------------|----------------------|----------------------|----------------------|----------------------------------------------|
|           | WT                                                                | <i>pus1</i> $\Delta$ | <i>trm2</i> $\Delta$ | <i>trm4</i> $\Delta$ | <i>trm9</i> $\Delta$ | <i>trm4</i> $\Delta$<br><i>trm8</i> $\Delta$ |
| Lys (UUU) | 1.07 $\pm$ 0.08                                                   | 0.94 $\pm$ 0.11      | 1.00 $\pm$ 0.08      | 0.94 $\pm$ 0.03      | 0.93 $\pm$ 0.13      | 0.99 $\pm$ 0.03                              |
| Lys (CUU) | 1.10 $\pm$ 0.08                                                   | 1.06 $\pm$ 0.13      | 1.03 $\pm$ 0.08      | 1.05 $\pm$ 0.02      | 0.95 $\pm$ 0.12      | 0.99 $\pm$ 0.03                              |
| Arg (UCU) | 1.05 $\pm$ 0.04                                                   | 0.98 $\pm$ 0.06      | 0.93 $\pm$ 0.02      | 0.93 $\pm$ 0.04      | 0.87 $\pm$ 0.05      | 1.00 $\pm$ 0.04                              |
| Arg (CCU) | 1.13 $\pm$ 0.04                                                   | 1.14 $\pm$ 0.02      | 0.98 $\pm$ 0.05      | 1.07 $\pm$ 0.06      | 0.87 $\pm$ 0.07      | 1.02 $\pm$ 0.02                              |
| Asn (GUU) | 1.04 $\pm$ 0.08                                                   | 0.99 $\pm$ 0.04      | 0.97 $\pm$ 0.08      | 1.01 $\pm$ 0.02      | 0.85 $\pm$ 0.04      | 0.97 $\pm$ 0.03                              |
| Glu (UUC) | 0.97 $\pm$ 0.05                                                   | 0.98 $\pm$ 0.05      | 0.99 $\pm$ 0.05      | 1.00 $\pm$ 0.04      | 0.97 $\pm$ 0.04      | 1.08 $\pm$ 0.03                              |
| Gly (UCC) | 1.11 $\pm$ 0.10                                                   | 1.09 $\pm$ 0.04      | 0.97 $\pm$ 0.02      | 0.98 $\pm$ 0.04      | 0.90 $\pm$ 0.03      | 1.11 $\pm$ 0.05                              |
| Gly (CCC) | 1.09 $\pm$ 0.09                                                   | 1.03 $\pm$ 0.07      | 1.00 $\pm$ 0.04      | 1.10 $\pm$ 0.10      | 0.85 $\pm$ 0.07      | 1.01 $\pm$ 0.06                              |
| Asp (GUC) | 1.12 $\pm$ 0.02                                                   | 1.10 $\pm$ 0.10      | 1.00 $\pm$ 0.02      | 1.10 $\pm$ 0.06      | 0.91 $\pm$ 0.02      | 1.01 $\pm$ 0.05                              |

**Table S5:** Effect of *mtr10*

| Mutation             | GAU             |                       |      | GAC             |                       |      | GGA             |                       |      | GGG             |                       |      |
|----------------------|-----------------|-----------------------|------|-----------------|-----------------------|------|-----------------|-----------------------|------|-----------------|-----------------------|------|
|                      | <i>MTR10</i>    | <i>mtr10</i> $\Delta$ | P    |
| WT                   | 1.36 $\pm$ 0.16 | 1.32 $\pm$ 0.04       | 0.80 | 1.09 $\pm$ 0.06 | 1.16 $\pm$ 0.08       | 0.49 | 1.83 $\pm$ 0.29 | 1.60 $\pm$ 0.28       | 0.56 | 0.27 $\pm$ 0.02 | 0.30 $\pm$ 0.02       | 0.33 |
| <i>pus1</i> $\Delta$ | 2.14 $\pm$ 0.15 | 1.73 $\pm$ 0.18       | 0.09 | 1.52 $\pm$ 0.09 | 1.39 $\pm$ 0.17       | 0.53 | 3.45 $\pm$ 0.31 | 3.06 $\pm$ 0.58       | 0.59 | 0.56 $\pm$ 0.06 | 0.50 $\pm$ 0.05       | 0.58 |
| <i>trm2</i> $\Delta$ | 3.70 $\pm$ 0.39 | 4.81 $\pm$ 0.20       | 0.06 | 3.63 $\pm$ 0.49 | 3.11 $\pm$ 0.16       | 0.35 | 1.84 $\pm$ 0.30 | 1.17 $\pm$ 0.05       | 0.13 | 1.18 $\pm$ 0.09 | 1.35 $\pm$ 0.17       | 0.36 |
| <i>trm4</i> $\Delta$ | 1.22 $\pm$ 0.21 | 1.29 $\pm$ 0.05       | 0.84 | 1.50 $\pm$ 0.19 | 1.00 $\pm$ 0.17       | 0.06 | 2.10 $\pm$ 0.65 | 1.89 $\pm$ 0.36       | 0.78 | 0.37 $\pm$ 0.07 | 0.35 $\pm$ 0.00       | 0.75 |

| Mutation                                    | AAU             |                       |      | AAC             |                       |      | AGG             |                       |      | UAG             |                       |      |
|---------------------------------------------|-----------------|-----------------------|------|-----------------|-----------------------|------|-----------------|-----------------------|------|-----------------|-----------------------|------|
|                                             | <i>MTR10</i>    | <i>mtr10</i> $\Delta$ | P    |
| WT                                          | 1.61 $\pm$ 0.26 | 2.11 $\pm$ 0.24       | 0.21 | 1.81 $\pm$ 0.29 | 2.40 $\pm$ 0.30       | 0.24 | 8.42 $\pm$ 0.85 | 11.0 $\pm$ 0.71       | 0.63 | 21.3 $\pm$ 3.45 | 24.8 $\pm$ 1.74       | 0.50 |
| <i>pus1</i> $\Delta$                        | 3.06 $\pm$ 0.60 | 4.10 $\pm$ 0.41       | 0.28 | 3.77 $\pm$ 0.46 | 4.50 $\pm$ 0.45       | 0.21 | 10.2 $\pm$ 1.46 | 8.70 $\pm$ 2.05       | 0.51 | 6.56 $\pm$ 1.01 | 5.91 $\pm$ 0.36       | 0.64 |
| <i>trm2</i> $\Delta$                        | 3.75 $\pm$ 0.47 | 4.35 $\pm$ 0.41       | 0.26 | 4.13 $\pm$ 0.44 | 4.80 $\pm$ 0.35       | 0.37 | 11.1 $\pm$ 2.04 | 16.6 $\pm$ 1.18       | 0.05 | 14.5 $\pm$ 4.16 | 9.37 $\pm$ 0.61       | 0.32 |
| <i>trm4</i> $\Delta$                        | 2.10 $\pm$ 0.22 | 2.89 $\pm$ 0.24       | 0.50 | 2.68 $\pm$ 0.34 | 3.12 $\pm$ 0.23       | 0.69 | 12.3 $\pm$ 0.78 | 16.2 $\pm$ 3.13       | 0.09 | 12.5 $\pm$ 4.39 | 7.56 $\pm$ 0.47       | 0.47 |
| <i>trm8</i> $\Delta$                        | 2.54 $\pm$ 0.42 | 2.81 $\pm$ 0.05       | 0.66 | 2.35 $\pm$ 0.41 | 2.64 $\pm$ 0.08       | 0.66 | 9.37 $\pm$ 1.03 | 10.6 $\pm$ 0.17       | 0.52 | 7.87 $\pm$ 0.98 | 6.96 $\pm$ 0.42       | 0.69 |
| <i>trm4</i> $\Delta$ / <i>trm8</i> $\Delta$ | 1.29 $\pm$ 0.19 | 1.46 $\pm$ 0.19       | 0.21 | 1.27 $\pm$ 0.11 | 1.53 $\pm$ 0.17       | 0.59 | 6.53 $\pm$ 0.86 | 6.92 $\pm$ 0.21       | 0.77 | 20.9 $\pm$ 3.14 | 16.9 $\pm$ 3.01       | 0.43 |

**Table S6.** *S. cerevisiae* strains used in this work

| <b>Strain</b>             | <b>Strain Number</b> | <b>Genotype</b>                                                               | <b>Source</b>     |
|---------------------------|----------------------|-------------------------------------------------------------------------------|-------------------|
| <i>dus1Δ</i>              | PF999                | <i>dus1::KanMX his3Δ1 leu2Δ0 met15Δ0 ura3Δ0 MATα</i>                          | This study        |
| <i>dus2Δ</i>              | PF1002               | <i>dus2::KanMX his3Δ1 leu2Δ0 met15Δ0 ura3Δ0 MATα</i>                          | This study        |
| <i>dus3Δ</i>              | PF1005               | <i>dus3::KanMX his3Δ1 leu2Δ0 met15Δ0 ura3Δ0 MATα</i>                          | This study        |
| <i>dus4Δ</i>              | PF1186               | <i>dus4::KanMX his3Δ1 leu2Δ0 met15Δ0 ura3Δ0 MATα</i>                          | This study        |
| <i>pus1Δ</i>              | PF991                | <i>pus1::KanMX his3Δ1 leu2Δ0 met15Δ0 ura3Δ0 MATα</i>                          | This study        |
| <i>pus1Δ</i>              | PF1247               | <i>pus1::HphMX his3Δ1 leu2Δ0 met15Δ0 ura3Δ0 MATα</i>                          | This study        |
| <i>pus1Δ</i>              | PF1261               | <i>pus1::KanMX his3Δ1 leu2Δ0 met15Δ0 ura3Δ0 MATα</i>                          | This study        |
| <i>pus1Δ mtr10Δ</i>       | PF1251               | <i>pus1::HphMX mtr10::KanMX his3Δ1 leu2Δ0 met15Δ0 ura3Δ0 MATα</i>             | This study        |
| <i>pus4Δ</i>              | PF993                | <i>pus4::KanMX his3Δ1 leu2Δ0 met15Δ0 ura3Δ0 MATα</i>                          | This study        |
| <i>trm11Δ</i>             | PF1185               | <i>trm11::KanMX his3Δ1 leu2Δ0 met15Δ0 ura3Δ0 MATα</i>                         | This study        |
| <i>trm2Δ</i>              | PF996                | <i>trm2::KanMX his3Δ1 leu2Δ0 met15Δ0 ura3Δ0 MATα</i>                          | This study        |
| <i>trm2Δ</i>              | PF1245               | <i>trm2::HphMX his3Δ1 leu2Δ0 met15Δ0 ura3Δ0 MATα</i>                          | This study        |
| <i>trm2Δ</i>              | PF1260               | <i>trm2::KanMX his3Δ1 leu2Δ0 met15Δ0 ura3Δ0 MATα</i>                          | This study        |
| <i>trm2Δ mtr10Δ</i>       | PF1248               | <i>trm2::HphMX mtr10::KanMX his3Δ1 leu2Δ0 met15Δ0 ura3Δ0 MATα</i>             | This study        |
| <i>trm4Δ</i>              | PF887                | <i>trm4::NatMX his3Δ1 leu2Δ0 met15Δ0 ura3Δ0 MATα</i>                          | Dr. Eric Phizicky |
| <i>trm4Δ</i>              | PF1262               | <i>trm4::NatMX his3Δ1 leu2Δ0 met15Δ0 ura3Δ0 MATα</i>                          | This study        |
| <i>trm4Δ mtr10Δ</i>       | PF1243               | <i>trm4::NatMX mtr10::KanMX his3Δ1 leu2Δ0 met15Δ0 ura3Δ0 MATα</i>             | This study        |
| <i>trm4Δ trm8Δ</i>        | PF1249               | <i>trm4::HphMX trm8::NatMX his3Δ1 leu2Δ0 met15Δ0 ura3Δ0 MATα</i>              | This study        |
| <i>trm4Δ trm8Δ</i>        | PF1264               | <i>trm4::KanMX trm8::NatMX his3Δ1 leu2Δ0 met15Δ0 ura3Δ0 MATα</i>              | This study        |
| <i>trm4Δ trm8Δ mtr10Δ</i> | PF1252               | <i>trm4::HphMX trm8::NatMX mtr10::KanMX his3Δ1 leu2Δ0 met15Δ0 ura3Δ0 MATα</i> | This study        |
| <i>trm8Δ</i>              | PF890                | <i>trm8::NatMX his3Δ1 leu2Δ0 met15Δ0 ura3Δ0 MATα</i>                          | Dr. Eric Phizicky |
| <i>trm8Δ</i>              | PF1263               | <i>trm8::NanMX his3Δ1 leu2Δ0 met15Δ0 ura3Δ0 MATα</i>                          | This study        |
| <i>trm8Δ met22Δ</i>       | PF891                | <i>trm8::NatMX met22::HphMX his3Δ1 leu2Δ0 met15Δ0 ura3Δ0 MATα</i>             | Dr. Eric Phizicky |
| <i>trm8Δ mtr10Δ</i>       | PF1244               | <i>trm8::NatMX mtr10::KanMX his3Δ1 leu2Δ0 met15Δ0 ura3Δ0 MATα</i>             | This study        |
| <i>trm8Δ trm4Δ</i>        | PF876                | <i>trm8::NatMX trm4::KanMX his3Δ1 leu2Δ0 met15Δ0 ura3Δ0 MATα</i>              | Dr. M. Conner     |
| BY4742                    | PF884                | <i>WT his3Δ1 leu2Δ0 met15Δ0 ura3Δ0 MATα</i>                                   | Dr. Eric Phizicky |

**Figure S1:** Southern blotting to tRNA cDNA copies

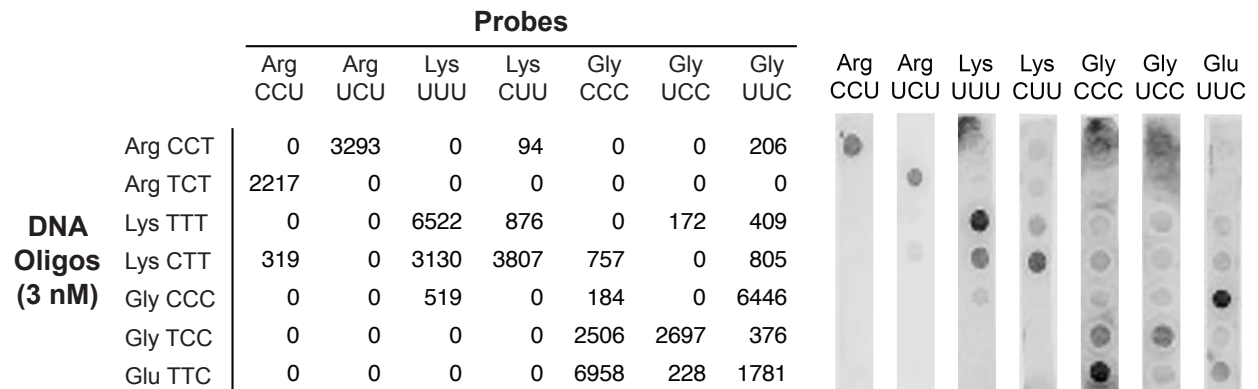

Supplement: Supplemental_Material.pdf [file Supplemental_Material.pdf]
